# Supplementary material
Source: MDPI journal article supplement (https://www.mdpi.com/search?q=ijerph-17-09477)
Supplement: s001 [file ijerph-17-09477-s001.pdf]

Supplemental Table 1. Bivariate Correlations.

|                                 | (1)   | (2)   | (3)   | (4)   | (5)   | (6)   | (7)   | (8)   | (9)   | (10)  |
|---------------------------------|-------|-------|-------|-------|-------|-------|-------|-------|-------|-------|
| <b>(1)</b> Age (Years)          | -     |       |       |       |       |       |       |       |       |       |
| <b>(2)</b> Female               | -0.03 | -     |       |       |       |       |       |       |       |       |
| <b>(3)</b> LGB                  | -0.02 | 0.19  | -     |       |       |       |       |       |       |       |
| <b>(4)</b> African American     | 0.04  | 0.01  | -0.01 | -     |       |       |       |       |       |       |
| <b>(5)</b> White                | 0.01  | -0.02 | 0.01  | -0.71 | -     |       |       |       |       |       |
| <b>(6)</b> Other                | -0.07 | 0.01  | 0.00  | -0.44 | -0.32 | -     |       |       |       |       |
| <b>(7)</b> Sexting Perp.        | -0.01 | -0.05 | 0.02  | 0.04  | -0.04 | -0.01 | -     |       |       |       |
| <b>(8)</b> Empathy              | -0.01 | -0.01 | 0.01  | 0.02  | 0.00  | -0.02 | -0.01 | -     |       |       |
| <b>(9)</b> Adult Support        | 0.03  | -0.01 | -0.03 | -0.09 | 0.09  | 0.01  | -0.03 | -0.02 | -     |       |
| <b>(10)</b> Family Support      | -0.01 | 0.01  | -0.13 | -0.12 | 0.14  | -0.02 | -0.07 | 0.00  | 0.45  | -     |
| <b>(11)</b> Peer Support        | -0.05 | 0.10  | -0.02 | -0.20 | 0.17  | 0.04  | -0.03 | -0.01 | 0.39  | 0.54  |
| <b>(12)</b> School Belonging    | -0.01 | -0.05 | -0.10 | -0.07 | 0.06  | 0.01  | -0.02 | 0.01  | 0.47  | 0.28  |
| <b>(13)</b> Parental Monitoring | -0.07 | 0.05  | -0.07 | -0.05 | 0.05  | 0.01  | -0.08 | -0.02 | 0.28  | 0.42  |
| <b>(14)</b> Impulsivity         | 0.00  | 0.01  | -0.02 | -0.01 | 0.00  | 0.01  | 0.00  | 0.12  | -0.02 | 0.02  |
| <b>(15)</b> Pornography         | 0.04  | -0.01 | 0.02  | -0.02 | 0.00  | 0.02  | 0.05  | 0.00  | 0.01  | 0.03  |
| <b>(16)</b> No. Dating Partners | -0.02 | -0.17 | 0.04  | 0.24  | -0.22 | -0.03 | 0.08  | 0.00  | -0.05 | -0.14 |
| <b>(17)</b> Sexual Activity     | 0.00  | 0.01  | 0.01  | 0.00  | 0.01  | -0.01 | -0.02 | 0.00  | 0.03  | 0.05  |
| <b>(18)</b> Risky Sexual Act.   | 0.00  | 0.01  | -0.02 | 0.01  | -0.04 | 0.04  | 0.00  | -0.10 | 0.05  | 0.00  |
| <b>(19)</b> Alcohol and Drugs   | 0.11  | -0.03 | 0.14  | 0.02  | 0.03  | -0.06 | 0.13  | 0.00  | -0.14 | -0.15 |
| <b>(20)</b> Homophobic Perp.    | 0.03  | -0.19 | 0.00  | 0.10  | -0.06 | -0.05 | 0.18  | 0.02  | -0.11 | -0.09 |
| <b>(21)</b> Bullying Perp.      | -0.02 | -0.05 | 0.05  | 0.13  | -0.10 | -0.04 | 0.27  | 0.05  | -0.11 | -0.13 |
| <b>(22)</b> Delinquency         | 0.02  | -0.05 | 0.10  | 0.02  | -0.01 | -0.01 | 0.19  | 0.01  | -0.11 | -0.15 |

---

| (11) | (12) | (13) | (14) | (15) | (16) | (17) | (18) | (19) | (20) | (21) | (22) |
|------|------|------|------|------|------|------|------|------|------|------|------|
|------|------|------|------|------|------|------|------|------|------|------|------|

---

|       |       |       |       |      |      |       |      |      |      |      |   |
|-------|-------|-------|-------|------|------|-------|------|------|------|------|---|
| -     |       |       |       |      |      |       |      |      |      |      |   |
| 0.22  | -     |       |       |      |      |       |      |      |      |      |   |
| 0.22  | 0.22  | -     |       |      |      |       |      |      |      |      |   |
| 0.04  | -0.01 | 0.02  | -     |      |      |       |      |      |      |      |   |
| 0.02  | 0.00  | 0.00  | 0.11  | -    |      |       |      |      |      |      |   |
| -0.10 | -0.05 | -0.17 | -0.02 | 0.01 | -    |       |      |      |      |      |   |
| 0.07  | 0.02  | 0.03  | 0.07  | 0.21 | 0.02 | -     |      |      |      |      |   |
| 0.01  | 0.00  | -0.02 | 0.13  | 0.15 | 0.06 | 0.45  | -    |      |      |      |   |
| -0.09 | -0.17 | -0.29 | 0.00  | 0.03 | 0.16 | -0.04 | 0.01 | -    |      |      |   |
| -0.07 | -0.13 | -0.18 | 0.02  | 0.00 | 0.15 | 0.00  | 0.01 | 0.23 | -    |      |   |
| -0.07 | -0.11 | -0.23 | 0.04  | 0.00 | 0.11 | -0.01 | 0.04 | 0.25 | 0.55 | -    |   |
| -0.03 | -0.17 | -0.34 | 0.01  | 0.03 | 0.17 | 0.00  | 0.04 | 0.51 | 0.36 | 0.44 | - |

---
